# Supplementary material
Source: MDPI journal article supplement (https://www.mdpi.com/2079-6412/12/12/1858)
Supplement: s1 [file s1]

**Table S5.** *Streptomyces* strains source of bioactive crude extracts.

| Color/ Possible type of pigment   | <i>Streptomyces</i> strain                     | Bioactivity tested | Source type              | Reference |
|-----------------------------------|------------------------------------------------|--------------------|--------------------------|-----------|
| Violet–blue                       | <i>Streptomyces vietnamensis</i> sp. nov.      | Antimicrobial      | Soil (Free – living)     | [1]       |
| Possible Carotenoid (Red pigment) | <i>Streptomyces parvullus</i> M4               | N/A                | N/A                      | [2]       |
|                                   | <i>Streptomyces coelicolor</i> M6              |                    |                          |           |
|                                   | <i>Streptomyces canaries</i> M8                |                    |                          |           |
| Actinorhodin-related compounds.   | <i>Streptomyces</i> sp. LS-1                   | N/A                | Soil (Free – living)     | [3]       |
| Yellow pigment                    | <i>Streptomyces</i> sp. D10                    | Antimicrobial      | Soil (Free – living)     | [4]       |
|                                   | <i>Streptomyces</i> sp. D25                    | Antimicrobial      | Soil (Free – living)     | [5]       |
|                                   | <i>Streptomyces</i> SAG-85                     | Antimicrobial      | Soil (Free – living)     | [6]       |
|                                   | <i>Streptomyces</i> sp. SFA5                   | Antimicrobial      | Soil (Free – living)     | [7]       |
|                                   | <i>Streptomyces griseoaurantiacus</i> JUACT 01 | Cytotoxic          | Soil (Free – living)     | [8]       |
|                                   | <i>Streptomyces</i> sp. Ac-1                   | Antimicrobial      | Freshwater (Free-living) | [9]       |
|                                   | <i>Streptomyces</i> sp. Ac-2                   |                    |                          |           |
|                                   | <i>Streptomyces</i> sp. Ac-9                   |                    |                          |           |
|                                   | <i>Streptomyces parvulus</i> C5-5Y             | Antimicrobial      | Soil (Free – living)     | [10]      |
|                                   | <i>Streptomyces</i> sp.                        | Multiple           | Marine (Free – living)   | [11]      |
| Red pigment                       | <i>Streptomyces</i> sp. PM4                    | Cytotoxic          | Marine Symbiont          | [12]      |
|                                   | <i>Streptomyces</i> sp. A 16-1                 | Cytotoxic          | Soil (Free – living)     | [13]      |

|               |                                          |                      |                      |      |
|---------------|------------------------------------------|----------------------|----------------------|------|
|               | <i>Streptomyces peucetius</i> ATCC 29050 | Antimicrobial Agents | N/A                  | [14] |
|               | <i>Streptomyces</i> sp.                  | N/A                  | Marine Symbiont      | [15] |
| Pink pigment  | <i>Streptomyces</i> sp. NS-05            | Antimicrobial        | Soil (Free – living) | [16] |
| Pinkish brown | <i>Streptomyces</i> sp. S45              | Antimicrobial        | Soil (Free – living) | [17] |
| Depp blue     | <i>Streptomyces</i> sp. NP2              | N/A                  | Soil (Free – living) | [18] |
| Depp red      | <i>Streptomyces</i> sp. NP4              |                      |                      |      |
| Light brown   | <i>Streptomyces coeruleorubidus</i>      | Antimicrobial        | Soil (Free – living) | [19] |
| N/A           | <i>Streptomyces venezuelae</i> S13       | N/A                  | N/A                  | [20] |
| N/A           | <i>Streptomyces coelicolor</i> MSIS1     | Multiple             | Soil (Free – living) | [21] |

## References

1. Zhu, H.-H.; Guo, J.; Yao, Q.; Yang, S.-Z.; Deng, M.-R.; Le Phuong, T.B.; Hanh, V.T.; Ryan, M.J. *Streptomyces Vietnamensis* Sp. Nov., a Streptomycece with Violet Blue Diffusible Pigment Isolated from Soil in Vietnam. *Int. J. Syst. Evol. Microbiol.* **2007**, *57*, 1770–1774, doi:10.1099/ij.s.0.64774-0.
2. Sakr, A.A.; Ali, M.F.; Ghaly, M.F.; Abdel-Halim, M.-S.F. Discoloration of Ancient Egyptian Mural Paintings by *Streptomyces* Strains and Methods of Its Removal. *Int. J. Conserv. Sci.* **2012**, *3*, 249–258.
3. Lu, L.; Cui, H.L.; Chen, Y.N.; Yuan, S. Isolation and Identification of *Streptomyces* Sp. and Assay of Its Exocellular Water-Soluble Blue Pigments. *Folia Microbiol. (Praha)*. **2002**, *47*, 493–498, doi:10.1007/BF02818787.
4. Selvameenal, L.; Radhakrishnan, M.; Balagurunathan, R. Antibiotic Pigment from Desert Soil Actinomycetes; Biological Activity, Purification and Chemical Screening. *Indian J. Pharm. Sci.* **2009**, *71*, 499–504, doi:10.4103/0250-474X.58174.
5. Manikkam, R.; Venugopal, G.; Ramasamy, B.; Kumar, V. Effect of Critical Medium Components and Culture Conditions on Antitubercular Pigment Production from Novel *Streptomyces* Sp. D25 Isolated from Thar Desert, Rajasthan. *J. Appl. Pharm. Sci.* **2015**, *5*, 15–19, doi:10.7324/JAPS.2015.50603.
6. Al-Ghamdi, S.A.; Jastaniah, S.D.; Amasha, R.H. Isolation and Screening of Actinomycetes from Umm Jirsan Cave, Saudi Arabia for Their Antibacterial Activity. *Biosci. Biotechnol. Res. Commun.* **2021**, *14*, doi:10.21786/bbrc/14.1/50.
7. Manikkam, R.; Ponnuswamy, S.; Joseph, J.; Kumar, V. Antitubercular Activity of the Pigment from Forest Soil *Streptomyces* Sp. SFA5. *Bangladesh J. Pharmacol.* **2016**, *11*, 138–140, doi:10.3329/bjp.v11i1.24238.
8. Prashanthi, K.; Suryan, S.; Varalakshmi, K.N. In Vitro Anticancer Property of Yellow Pigment from *Streptomyces*

- Griseoaurantiacus* JUACT 01. *Brazilian Arch. Biol. Technol.* **2015**, *58*, 869–876, doi:10.1590/S1516-89132015060271.
9. Naligama, K.; Weerasinghe, K.; Halmillawewa, A. Characterization of Bioactive Actinomycetes Isolated from Kadolkele Mangrove Sediments, Sri Lanka. *Polish J. Microbiol.* **2022**, *71*, 191–204, doi:10.33073/pjm-2022-017.
  10. Soundari, A.P.G.; Mani, V.M.; Bose, V.S.C.; Jabastin, J.; Priyadarisini, V.B. A Preliminary Assessment of Yellow Pigment from *Streptomyces Parvulus* C5-5Y. *J. Pure Appl. Microbiol.* **2017**, *11*, 197–203, doi:10.22207/JPAM.11.1.25.
  11. Kamble Geetanjali, R.; Gireesh Babu, K.; Hiremath Shivaprakash, V.; Hiremath Murigendra, B. In Vitro Antimicrobial and Anti-Proliferative Activity of Crude Methanolic Extract of Pigment from *Streptomyces* Spp. on HT-1080 Fibro Sarcoma Cell Line. *Res. J. Biotechnol.* **2022**, *17*, 64–69, doi:10.25303/1705rjbt64069.
  12. Karuppiyah, V.; Aarthi, C.; ramohan; Sivakumar, K.; Kannan, L. Statistical Optimization and Anticancer Activity of a Red Pigment Isolated from *Streptomyces* Sp. PM4. *Asian Pac. J. Trop. Biomed.* **2013**, *3*, 650–656, doi:10.1016/S2221-1691(13)60131-8.
  13. Saengkhae, C.; Srivibool, R.; Watanadilok, R.; Enomoto, K. Partially Purified Pigment Extract from *Streptomyces* A 16-1 Induces Apoptosis of Human Carcinoma of Nasopharynx Cell (KB Cells) via the Mitochondrial and Caspase-3 Pathway. *Walailak J. Sci. Technol.* **2017**, *14*, doi:10.14456/vol14iss1pp.
  14. Prasad, R.; Sasikala, V.; Vetrivel, K.S.; Dharmalingam, K. A Novel Extracellular Protein of *Streptomyces Peucetius* Binds to Daunorubicin but Does Not Inhibit the Bioactivity of the Antibiotic. *Biochem. Biophys. Res. Commun.* **2003**, *311*, 460–464, doi:10.1016/j.bbrc.2003.09.229.
  15. Dharmaraj, S.; Ashokkumar, B.; Dhevendaran, K. Food-Grade Pigments from *Streptomyces* Sp. Isolated from the Marine Sponge *Callyspongia Diffusa*. *Food Res. Int.* **2009**, *42*, 487–492, doi:10.1016/j.foodres.2009.02.006.
  16. Singh, N.; Naik, B.; Kumar, V.; Kumar, A.; Kumar, V.; Gupta, S. Actinobacterial Assisted Synthesis of Nanoparticles and Its Iological Activity. *J. Microbiol. Biotechnol. Food Sci.* **2021**, *10*, 604–608, doi:10.15414/jmbfs.2021.10.4.604-608.
  17. Vaishnavi, M.; Manigundan, K.; Smalia, T.; Nandhini, S.U.; Gopikrishnan, V.; Kumar, A.; Hanna, L.E.; Radhakrishnan, M.; Aruni, W. Antibacterial and Anti-HIV Activity of Extracellular Pigment from *Streptomyces* Sp. S45 Isolated from Sabarimala Forest Soil, India. *Indian J. Exp. Biol.* **2020**, *58*, 861–868, doi:10.56042/ijeb.v58i12.44575.
  18. Kramar, A.; Ilic-Tomic, T.; Petkovic, M.; Radulović, N.; Kostic, M.; Jovic, D.; Nikodinovic-Runic, J. Crude Bacterial Extracts of Two New *Streptomyces* Sp. Isolates as Bio-Colorants for Textile Dyeing. *World J. Microbiol. Biotechnol.* **2014**, *30*, 2231–2240, doi:10.1007/s11274-014-1644-x.
  19. Azimi, S.; Baserisalehi, M.; Bahador, N. Evaluation of Antimicrobial Pigment Produced by *Streptomyces Coeruleorubidus*. *Nat. Environ. Pollut. Technol.* **2014**, *13*, 641–644.
  20. Scribner, H.E.; Tang, T.; Bradley, S.G. Production of a Sporulation Pigment by *Streptomyces Venezuelae*. *Appl. Microbiol.* **1973**, *25*, 873–879, doi:10.1128/aem.25.6.873-879.1973.
  21. Mohanasrinivasan SriramKalyan P. Ipsita N. Subathradevi C. Selvarajan E. Suganthi V. Jemimah N.S., V. Fermentative Production of Extracellular Pigment from *Streptomyces Coelicolor*MSIS1. *Res. J. Biotechnol.* **2013**, *8*.
