# Supplementary material
Source: MDPI journal article supplement (https://www.mdpi.com/2079-6412/12/12/1858)
Supplement: s1 [file s1]

**Table S2.** Gram Negative Bacteria evaluated in the antimicrobial test.

| Gram Negative                                                                                                                                                                  | Ref.               |
|--------------------------------------------------------------------------------------------------------------------------------------------------------------------------------|--------------------|
| <i>Aeromonas</i> sp. (FPO6, FPO2)                                                                                                                                              | [1]                |
| <i>Citrobacter</i> sp. FPO3, <i>Citrobacter freundii</i> (ATCC 8090)                                                                                                           | [1,2]              |
| <i>Edwardsiella</i> sp. FPO4                                                                                                                                                   | [1]                |
| <i>Vibrio</i> sp. FPO5, <i>Vibrio cholerae</i>                                                                                                                                 | [1,3]              |
| <i>Escherichia coli</i> (ATCC.1330, ATCC 25922, ATCC8739, ATCC 8379, NIHJ JC-2, MTCC730), <i>E. coli</i>                                                                       | [2–16]             |
| <i>Proteus mirabilis</i>                                                                                                                                                       | [3]                |
| <i>Salmonella typhi</i> (ATCC6539, MTCC733), <i>S. paratyphae</i> , <i>Salmonella</i> sp., <i>S. enterica</i> MTCC1165, <i>S. enterica typhimurium</i> MTCC98, <i>S. typhi</i> | [3,5,8,9,12,14,15] |
| <i>Klebsiella oxytoca</i> , <i>Klebsiella pneumonia</i> (ATCC 1053, ATCC 13883, ATCC 13882, MTCC109), <i>Klebsiella</i> sp., <i>K. pneumonia</i>                               | [3–5,8–10,13–17]   |
| <i>Pseudomonas aeruginosa</i> (ATCC 1074, ATCC 27853, ATCC 6538, ATCC9027), <i>P. aeruginosa</i>                                                                               | [2,5,6,9–17]       |
| <i>Shigella dysenteriae</i> (ATCC 1183), <i>Shigella</i> sp.                                                                                                                   | [2,5,9,15]         |
| <i>Serratia marcescens</i> (ATCC 14756), <i>S. marcescens</i>                                                                                                                  | [2,14]             |
| <i>Proteus</i> sp., <i>Proteus mirabilis</i> , <i>Proteus vulgaris</i>                                                                                                         | [5,9,15]           |

**Table S3.** Gram Positive Bacteria evaluated in the antimicrobial test.

| Gram Positive                                                                                                                                                     | Ref.                         |
|-------------------------------------------------------------------------------------------------------------------------------------------------------------------|------------------------------|
| <i>Mycobacterium smegmatis</i> 3, <i>Mycobacterium tuberculosis</i> H37Rv                                                                                         | [6,18–20]                    |
| <i>Staphylococcus aureus</i> (ATCC 1112, ATCC 25923, MTCC96, ATCC 29213, ATCC 6538, 209P JC-1, MTCC1430,15), <i>S. epidermidis</i> , MRSA, VRSA, <i>S. aureus</i> | [2–10,12–16,18,19]           |
| <i>Corynebacterium bovis</i> NIRD 129                                                                                                                             | [18]                         |
| <i>Nocardia asteroides</i> 3318                                                                                                                                   | [18]                         |
| <i>Bacillus</i> sp. FPO1, <i>Bacillus cereus</i> (ATCC1015), <i>Bacillus subtilis</i> ATCC6633, <i>Bacillus typhi</i> , <i>B. cereus</i> , <i>B. subtilis</i>     | [1,2,4,5,7,9,11–13,16,17,21] |
| <i>Lactobacillus vulgaris</i>                                                                                                                                     | [3]                          |
| <i>Enterococcus</i> sp., <i>Enterococcus faecalis</i> (ATCC 29212, MTCC9845), <i>E. faecalis</i>                                                                  | [5,8,9,14,15,19]             |
| <i>Micrococcus luteus</i> ATCC 379                                                                                                                                | [17]                         |
| <i>Streptococcus pyogenes</i> ATCC19615, <i>Streptococcus mutans</i> MTCC890.                                                                                     | [8,12]                       |

**Table S4.** Molds and Yeast evaluated in the antimicrobial test.

| Mushrooms and Yeast                                                                      | Ref.                  |
|------------------------------------------------------------------------------------------|-----------------------|
| <i>Aspergillus niger</i> (PTCC 5011), <i>A. niger</i>                                    | [2,16]                |
| <i>Candida albicans</i> (ATCC5027, ATCC 10231, ATCC 10259, TP-F0594), <i>C. albicans</i> | [2,6,7,9,11,12,16,17] |
| <i>Penicillium citrinum</i> AS3.2788                                                     | [11]                  |
| <i>Trichophyton rubrum</i> ATCC28188                                                     | [12]                  |
| <i>Saccharomyces cerevisiae</i> TP-F0176, <i>S. cerevisiae</i>                           | [7,16]                |

|                                                        |        |
|--------------------------------------------------------|--------|
| <i>Alternaria solani</i>                               | [16]   |
| <i>Bipolaris oryzae</i>                                | [16]   |
| <i>Rhizoctonia solani</i>                              | [16]   |
| <i>Fusarium oxysporum</i> MTCC387, <i>F. oxysporum</i> | [6,16] |

## References

1. Sivaperumal, P.; Kamala, K.; Rajaram, R.; Mishra, S.S. Melanin from Marine *Streptomyces* Sp. (MVCS13) with Potential Effect against Ornamental Fish Pathogens of *Carassius Auratus* (Linnaeus, 1758). *Biocatal. Agric. Biotechnol.* **2014**, *3*, 134–141, doi:10.1016/j.bcab.2014.09.007.
2. Azimi, S.; Baserisalehi, M.; Bahador, N. Evaluation of Antimicrobial Pigment Produced by *Streptomyces Coeruleorubidus*. *Nat. Environ. Pollut. Technol.* **2014**, *13*, 641–644.
3. Vasanthabharathi, V.; Lakshminarayanan, R.; Jayalakshmi, S. Melanin Production from Marine *Streptomyces*. *African J. Biotechnol.* **2011**, *10*, 11224–11234, doi:10.5897/AJB11.296.
4. Mohanasrinivasan SriramKalyan P. Ipsita N. Subathradevi C. Selvarajan E. Suganthi V. Jemimah N.S., V. Fermentative Production of Extracellular Pigment from *Streptomyces Coelicolor*MSIS1. *Res. J. Biotechnol.* **2013**, *8*.
5. Vijayabharathi, R.; Bruheim, P.; Andreassen, T.; Raja, D.S.; Devi, P.B.; Sathyabama, S.; Priyadarisini, V.B. Assessment of Resistomycin, as an Anticancer Compound Isolated and Characterized from *Streptomyces Aurantiacus* AAA5. *J. Microbiol.* **2011**, *49*, 920–926, doi:10.1007/s12275-011-1260-5.
6. Wang, L.; Li, Y.; Li, Y. Metal Ions Driven Production, Characterization and Bioactivity of Extracellular Melanin from *Streptomyces* Sp. ZL-24. *Int. J. Biol. Macromol.* **2019**, *123*, 521–530, doi:10.1016/j.ijbiomac.2018.11.061.
7. Ohnishi, Y.; Furusho, Y.; Higashi, T.; Chun, H.K.; Furihata, K.; Sakuda, S.; Horinouchi, S. Structures of Grixazone A and B, A-Factor-Dependent Yellow Pigments Produced under Phosphate Depletion by *Streptomyces Griseus*. *J. Antibiot. (Tokyo)*. **2004**, *57*, 218–223, doi:10.7164/antibiotics.57.218.
8. Ramesh, C.; Vinithkumar, N.V.; Kirubakaran, R.; Venil, C.K.; aisamy; Dufossé, L. Applications of Prodigiosin Extracted from Marine Red Pigmented Bacteria *Zooshikella* Sp. and Actinomycete *Streptomyces* Sp. *Microorganisms* **2020**, *8*, doi:10.3390/microorganisms8040556.
9. Soundari, A.P.G.; Mani, V.M.; Bose, V.S.C.; Jabastin, J.; Priyadarisini, V.B. A Preliminary Assessment of Yellow Pigment from *Streptomyces Parvulus* C5-5Y. *J. Pure Appl. Microbiol.* **2017**, *11*, 197–203, doi:10.22207/JPAM.11.1.25.
10. Selvameenal, L.; Radhakrishnan, M.; Balagurunathan, R. Antibiotic Pigment from Desert Soil Actinomycetes; Biological Activity, Purification and Chemical Screening. *Indian J. Pharm. Sci.* **2009**, *71*, 499–504, doi:10.4103/0250-474X.58174.
11. Zhu, H.-H.; Guo, J.; Yao, Q.; Yang, S.-Z.; Deng, M.-R.; Le Phuong, T.B.; Hanh, V.T.; Ryan, M.J. *Streptomyces Vietnamensis* Sp. Nov., a Streptomycete with Violet Blue Diffusible Pigment Isolated from Soil in Vietnam. *Int. J. Syst. Evol. Microbiol.* **2007**, *57*, 1770–1774, doi:10.1099/ijms.0.64774-0.
12. Meng-xi, L.I.; Hui-bin, H.; Jie-yun, L.; Jing-xiao, C.A.O.; Zhen-wang, Z. Antibacterial Performance of a *Streptomyces Spectabilis* Strain Producing Metacycloprodigiosin. *Curr. Microbiol.* **2021**, *78*, 2569–2576, doi:10.1007/s00284-021-02513-w.
13. Vaishnavi, M.; Manigundan, K.; Smalia, T.; Nandhini, S.U.; Gopikrishnan, V.; Kumar, A.; Hanna, L.E.; Radhakrishnan, M.; Aruni, W. Antibacterial and Anti-HIV Activity of Extracellular Pigment from *Streptomyces* Sp. S45 Isolated from Sabarimala Forest Soil, India. *Indian J. Exp. Biol.* **2020**, *58*, 861–868,

doi:10.56042/ijeb.v58i12.44575.

14. Al-Ghamdi, S.A.; Jastaniah, S.D.; Amasha, R.H. Isolation and Screening of Actinomycetes from Umm Jirsan Cave, Saudi Arabia for Their Antibacterial Activity. *Biosci. Biotechnol. Res. Commun.* **2021**, *14*, doi:10.21786/bbrc/14.1/50.
15. Abraham, J.; Chauhan, R. Profiling of Red Pigment Produced by *Streptomyces* Sp. JAR6 and Its Bioactivity. *3 Biotech* **2018**, *8*, 22, doi:10.1007/s13205-017-1044-7.
16. El-Naggar, N.E.-A.; El-Ewasy, S.M. Bioproduction, Characterization, Anticancer and Antioxidant Activities of Extracellular Melanin Pigment Produced by Newly Isolated Microbial Cell Factories *Streptomyces Glaucescens* NEAE-H. *Sci. Rep.* **2017**, *7*, 42129, doi:10.1038/srep42129.
17. Stankovic, N.; Radulovic, V.; Petkovic, M.; Vuckovic, I.; Jadranin, M.; Vasiljevic, B.; Nikodinovic-Runic, J. *Streptomyces* Sp. JS520 Produces Exceptionally High Quantities of Undecylprodigiosin with Antibacterial, Antioxidative, and UV-Protective Properties. *Appl. Microbiol. Biotechnol.* **2012**, *96*, 1217–1231, doi:10.1007/s00253-012-4237-3.
18. Gerber, N.N.; Lechevalier, M.P. Prodiginine (Prodigiosin-like) Pigments from *Streptomyces* and Other Aerobic Actinomycetes. *Can. J. Microbiol.* **1976**, *22*, 658–667, doi:10.1139/m76-097.
19. Manikkam, R.; Venugopal, G.; Ramasamy, B.; Kumar, V. Effect of Critical Medium Components and Culture Conditions on Antitubercular Pigment Production from Novel *Streptomyces* Sp. D25 Isolated from Thar Desert, Rajasthan. *J. Appl. Pharm. Sci.* **2015**, *5*, 15–19, doi:10.7324/JAPS.2015.50603.
20. Manikkam, R.; Ponnuswamy, S.; Joseph, J.; Kumar, V. Antitubercular Activity of the Pigment from Forest Soil *Streptomyces* Sp. SFA5. *Bangladesh J. Pharmacol.* **2016**, *11*, 138–140, doi:10.3329/bjp.v11i1.24238.
21. Prasad, R.; Sasikala, V.; Vetrivel, K.S.; Dharmalingam, K. A Novel Extracellular Protein of *Streptomyces Peucetius* Binds to Daunorubicin but Does Not Inhibit the Bioactivity of the Antibiotic. *Biochem. Biophys. Res. Commun.* **2003**, *311*, 460–464, doi:10.1016/j.bbrc.2003.09.229.
