# Supplementary material
Source: MDPI journal article supplement (https://www.mdpi.com/2079-6412/12/12/1858)
Supplement: s1 [file s1]

**Table S7.** *Streptomyces* pigments without any specific application.

| <i>Streptomyces</i> strain                | Type/Color of pigment                                                                                                                   | Ref. |
|-------------------------------------------|-----------------------------------------------------------------------------------------------------------------------------------------|------|
| <i>Streptomyces</i> sp. CWW6              | Streptorubrin A                                                                                                                         | [1]  |
| <i>Streptomyces</i> sp. 13-4              | Streptorubrin B                                                                                                                         | [1]  |
| <i>Streptomyces acidiscabies</i>          | Naphthoquinone derivatives:<br>Bright yellow compound (1) <sup>1</sup><br>Orange compound (2) <sup>2</sup><br>Compound (3) <sup>3</sup> | [2]  |
| <i>Streptomyces vietnamensis</i> sp. nov. | Violet-blue                                                                                                                             | [3]  |
| <i>Streptomyces aureofaciens</i> CCM 3239 | Indigoidine-like<br>(Blue pigment)                                                                                                      | [4]  |
| <i>Streptomyces</i> sp. LS-1              | Actinorhodin-related compounds.                                                                                                         | [5]  |
| <i>Streptomyces griseus</i>               | Grixazone A and B (Yellow pigments)                                                                                                     | [6]  |
| <i>Streptomyces parvullus</i> M4          | Possible Carotenoid (Red pigment)                                                                                                       | [7]  |
| <i>Streptomyces coelicolor</i> M6         |                                                                                                                                         |      |
| <i>Streptomyces canaries</i> M8           |                                                                                                                                         |      |

<sup>1</sup> The compound name is 2-(5-hydroxy-1,4-dioxo-1,4-dihydronaphthalen-2-yl)-3-methoxy-5-methylbenzoic acid

<sup>2</sup> The compound name is 2-(3,5-dihydroxy-1,4-dioxo-1,4-dihydronaphthalen-2-yl)-3-methoxy-5-methylbenzoic acid

<sup>3</sup> The compound name is 8-hydroxy-1-methoxy-3-methyl-5H-dibenzo [c,g] chromene-5,7,12-trione

**Table S8.** *Streptomyces* pigments belonging to the melanin family.

| Type/Color of pigment | <i>Streptomyces</i> strain              | Possible application                                                               | Ref. |
|-----------------------|-----------------------------------------|------------------------------------------------------------------------------------|------|
| Melanin               | <i>Streptomyces</i> sp.                 | Antioxidant and ultraviolet protector                                              | [8]  |
|                       | <i>Streptomyces</i> sp. MVCS13          | Antimicrobial Agent                                                                | [9]  |
|                       | <i>Streptomyces</i> sp. (F1,F2,F3)      |                                                                                    | [10] |
|                       | <i>Streptomyces glaucescens</i> NEAE-H  | Anticancer Agents                                                                  | [11] |
|                       | <i>Streptomyces</i> sp. ZL-24           | Antimicrobial, anti-biofilm and antioxidant Agent                                  | [12] |
|                       | <i>Streptomyces glaucescens</i> KCTC988 | Textile Dye                                                                        | [13] |
|                       | <i>Streptomyces cavourensis</i> SV 21   | Antioxidant, antimicrobial, and quorum quenching inhibiting, ultraviolet protector | [14] |
|                       | <i>Streptomyces puniceus</i> RHPR9      | Antimicrobial, antioxidant, anticancer, antiinflammatory                           | [15] |

|            |                                          |                                                             |      |
|------------|------------------------------------------|-------------------------------------------------------------|------|
| Eumelanin  | <i>Streptomyces fulvissimus</i><br>MPPS4 | Ultraviolet protector, antioxidant                          | [16] |
|            | <i>Streptomyces xiamenensis</i><br>MPPS6 |                                                             |      |
|            | <i>Streptomyces parvus</i><br>BSB49      | Anticancer Agents                                           | [17] |
| Pyomelanin | <i>Streptomyces</i> sp. MPPS2            | Possible nanocomposite and biocomposite material production | [18] |

**Table S9.** *Streptomyces* pigments belonging to the actinomycin family.

| Type/Color of pigment                         | <i>Streptomyces</i> strain         | Possible application         | Ref. |
|-----------------------------------------------|------------------------------------|------------------------------|------|
| Actinomycin X2                                | <i>Streptomyces cyaneofuscatus</i> | Antimicrobial and textil dye | [19] |
| Actinomycin L <sub>1</sub> and L <sub>2</sub> | <i>Streptomyces</i> sp. MBT27      | Antimicrobial Agent          | [20] |
| Yellow pigment (Possible Actinomycin)         | <i>Streptomyces parvulus</i> C5-5Y | Antimicrobial Agent          | [21] |

**Table S10.** *Streptomyces* pigments belonging to the actinorhodin and prodigiosin family.

| Type/Color of pigment                                                       | <i>Streptomyces</i> strain                    | Possible application                              | Ref.    |
|-----------------------------------------------------------------------------|-----------------------------------------------|---------------------------------------------------|---------|
| $\gamma$ -Actinorhodin<br>Actinorhodin<br>undecylprodigiosin<br>Prodigiosin | <i>Streptomyces coelicolor</i><br>A3(2)       | Antimicrobial agent                               | [22–25] |
| k-actinorhodin                                                              | <i>Streptomyces coelicolor</i><br>100         | Food Colorants                                    | [26]    |
| Undecylprodigiosin                                                          | <i>Streptomyces</i> sp. JS520                 | Textile dye, Antimicrobial Agents, Food Colorants | [27]    |
|                                                                             | <i>Streptomyces</i> sp. JAR6                  | Antimicrobial and anticancer agent                | [28]    |
|                                                                             | <i>Streptomyces longisporus</i> rubber<br>M-3 | N/A                                               | [29]    |
| Prodigiosin                                                                 | <i>Streptomyces</i> sp.<br>WMA-LM31           | Antioxidants, Anticancer Agents                   | [30]    |
|                                                                             | <i>Streptomyces</i> sp.<br>strain BSE6.1      | Antimicrobial Agents, Food Colorants              | [31]    |
|                                                                             | <i>Streptomyces</i> sp. NP4                   | Textile Dye                                       | [32]    |
| Metacycloprodigiosin                                                        | <i>Streptomyces spectabilis</i>               | Antimicrobial Agents                              | [33]    |

**Table S11.** Yellow *Streptomyces* pigments and its applications.

| Type/Color of pigment | <i>Streptomyces</i> strain                     | Possible application                 | Ref. |
|-----------------------|------------------------------------------------|--------------------------------------|------|
| Yellow pigment        | <i>Streptomyces</i> sp. D10                    | Antimicrobial Agents, Food Colorants | [34] |
|                       | <i>Streptomyces</i> sp. D25                    | Antitubercular agent                 | [35] |
|                       | <i>Streptomyces</i> SAG-85                     | Antimicrobial Agents                 | [36] |
|                       | <i>Streptomyces</i> sp. SFA5                   | Antitubercular agent                 | [37] |
|                       | <i>Streptomyces griseoaurantiacus</i> JUACT 01 | Anticancer Agents                    | [38] |
|                       | <i>Streptomyces</i> sp. Ac-1                   | Textile dye                          | [39] |
|                       | <i>Streptomyces</i> sp. Ac-2                   |                                      |      |
|                       | <i>Streptomyces</i> sp. Ac-9                   |                                      |      |

**Table S12.** Red and pink *Streptomyces* pigments and its applications.

| Type/Color of pigment | <i>Streptomyces</i> strain               | Possible application                                     | Ref. |
|-----------------------|------------------------------------------|----------------------------------------------------------|------|
| Red pigment           | <i>Streptomyces</i> sp.                  | Antimicrobial, antioxidant and anticancer agent          | [40] |
|                       | <i>Streptomyces</i> sp. PM4              | Anticancer Agent                                         | [41] |
|                       | <i>Streptomyces</i> sp. A 16-1           | Anticancer Agents                                        | [42] |
|                       | <i>Streptomyces peucetius</i> ATCC 29050 | Antimicrobial Agents                                     | [43] |
|                       | <i>Streptomyces</i> sp.                  | Food colorant                                            | [44] |
| Pink pigment          | <i>Streptomyces</i> sp. NS-05            | Antimicrobial and green synthesis of other nanoparticles | [45] |
| Pinkish brown         | <i>Streptomyces</i> sp. S45              | Antimicrobial Agents and anti-HIV                        | [46] |

**Table S13.** Other *Streptomyces* pigments and its applications.

| <i>Streptomyces</i> strain           | Type/Color of pigment | Possible application | Ref.    |
|--------------------------------------|-----------------------|----------------------|---------|
| <i>Streptomyces</i> sp. IFM 11299    | Katorazone            | Anticancer Agent     | [47]    |
| <i>Streptomyces</i> sp. A1013Y       | TDTA <sup>1</sup>     | Food Colorants       | [48]    |
| <i>Streptomyces aurantiacus</i> AAA5 | Resistomycin          | Anticancer Agents    | [49]    |
| <i>Streptomyces</i> sp. NP2          | Depp blue             | Textile Dye          | [32,50] |
| <i>Streptomyces</i> sp. NP4          | Depp red              |                      |         |
| <i>Streptomyces coeruleorubidus</i>  | Light brown           | Antimicrobial Agent  | [51]    |
| <i>Streptomyces venezuelae</i> S13   | N/A                   | pH Indicator         | [52]    |
| <i>Streptomyces coelicolor</i> MSIS1 | N/A                   | pH indicator         | [53]    |

<sup>1</sup>The compound name is 4,8,13-trihydroxy-6,11-dione-trihydrogranaticins A (TDTA)

## References

- Gerber, N.N.; Lechevalier, M.P. Prodiginine (Prodigiosin-like) Pigments from *Streptomyces* and Other Aerobic Actinomycetes. *Can. J. Microbiol.* **1976**, *22*, 658–667, doi:10.1139/m76-097.
- King, R.R.; Lawrence, C.H.; Calhoun, L.A. Isolation and Identification of Pigments Generated in Vitro by *Streptomyces Acidiscabies*. *J. Agric. Food Chem.* **1996**, *44*, 2849–2851, doi:10.1021/jf950766w.
- Zhu, H.-H.; Guo, J.; Yao, Q.; Yang, S.-Z.; Deng, M.-R.; Le Phuong, T.B.; Hanh, V.T.; Ryan, M.J. *Streptomyces Vietnamensis* Sp. Nov., a Streptomycete with Violet Blue Diffusible Pigment Isolated from Soil in Vietnam. *Int. J. Syst. Evol. Microbiol.* **2007**, *57*, 1770–1774, doi:10.1099/ijs.0.64774-0.
- Novakova, R.; Odnogova, Z.; Kutas, P.; Feckova, L.; Kormanec, J. Identification and Characterization of an Indigoidine-like Gene for a Blue Pigment Biosynthesis in *Streptomyces Aureofaciens* CCM 3239. *Folia Microbiol. (Praha)*. **2010**, *55*, 119–125.
- Lu, L.; Cui, H.L.; Chen, Y.N.; Yuan, S. Isolation and Identification of *Streptomyces* Sp. and Assay of Its Exocellular Water-Soluble Blue Pigments. *Folia Microbiol. (Praha)*. **2002**, *47*, 493–498, doi:10.1007/BF02818787.
- Ohnishi, Y.; Furusho, Y.; Higashi, T.; Chun, H.K.; Furihata, K.; Sakuda, S.; Horinouchi, S. Structures of Grixazone A and B, A-Factor-Dependent Yellow Pigments Produced under Phosphate Depletion by *Streptomyces Griseus*. *J. Antibiot. (Tokyo)*. **2004**, *57*, 218–223, doi:10.7164/antibiotics.57.218.
- Sakr, A.A.; Ali, M.F.; Ghaly, M.F.; Abdel-Haliem, M.-S.F. Discoloration of Ancient Egyptian Mural Paintings by *Streptomyces* Strains and Methods of Its Removal. *Int. J. Conserv. Sci.* **2012**, *3*, 249–258.
- Li, C.; Ji, C.; Tang, B. Purification, Characterisation and Biological Activity of Melanin from *Streptomyces* Sp. *FEMS Microbiol. Lett.* **2018**, *365*, doi:10.1093/femsle/fny077.
- Sivaperumal, P.; Kamala, K.; Rajaram, R.; Mishra, S.S. Melanin from Marine *Streptomyces* Sp. (MVCS13) with Potential Effect against Ornamental Fish Pathogens of *Carassius Auratus* (Linnaeus, 1758). *Biocatal. Agric. Biotechnol.* **2014**, *3*, 134–141, doi:10.1016/j.bcab.2014.09.007.
- Vasanthabharathi, V.; Lakshminarayanan, R.; Jayalakshmi, S. Melanin Production from Marine *Streptomyces*. *African J. Biotechnol.* **2011**, *10*, 11224–11234, doi:10.5897/AJB11.296.
- El-Naggar, N.E.-A.; El-Ewasy, S.M. Bioproduction, Characterization, Anticancer and Antioxidant Activities of Extracellular Melanin Pigment Produced by Newly Isolated Microbial Cell Factories *Streptomyces Glaucescens* NEAE-H. *Sci. Rep.* **2017**, *7*, 42129, doi:10.1038/srep42129.
- Wang, L.; Li, Y.; Li, Y. Metal Ions Driven Production, Characterization and Bioactivity of Extracellular Melanin from *Streptomyces* Sp. ZL-24. *Int. J. Biol. Macromol.* **2019**, *123*, 521–530, doi:10.1016/j.ijbiomac.2018.11.061.
- Ahn, S.-Y.; Jang, S.; Sudheer, P.D.V.N.; Choi, K.-Y. Microbial Production of Melanin Pigments from Caffeic Acid and L-Tyrosine Using *Streptomyces Glaucescens* and FCS-ECH-Expressing *Escherichia Coli*. *Int. J. Mol. Sci.* **2021**, *22*, 2413, doi:10.3390/ijms22052413.
- Wibowo, J.T.; Kellermann, M.Y.; Petersen, L.E.; Alfiansah, Y.R.; Lattyak, C.; Schupp, P.J. Characterization of an Insoluble and Soluble Form of Melanin Produced by *Streptomyces Cavourensis* SV 21, a Sea Cucumber Associated Bacterium. *Mar. Drugs* **2022**, *20*, doi:10.3390/md20010054.
- Polapally, R.; Mansani, M.; Rajkumar, K.; Burgula, S.; Hameeda, B.; Alhazmi, A.; Bantun, F.; Almalki, A.H.; Haque, S.; El Enshasy, H.A.; et al. Melanin Pigment of *Streptomyces Puniceus* RHPR9 Exhibits Antibacterial, Antioxidant and Anticancer Activities. *PLoS One* **2022**, *17*, e0266676, doi:10.1371/journal.pone.0266676.
- Bayram, S. A Comparative Characterization Study between Fungal and Bacterial Eumelanin Pigments. *Indian J. Microbiol.* **2022**, doi:10.1007/s12088-022-01012-1.

17. Bayram, S.; Dengiz, C.; Gerçek, Y.C.; Cetin, I.; Topcul, M.R. Bioproduction, Structure Elucidation and in Vitro Antiproliferative Effect of Eumelanin Pigment from *Streptomyces Parvus* BSB49. *Arch. Microbiol.* **2020**, *202*, 2401–2409, doi:10.1007/s00203-020-01956-2.
18. Bayram, S. Production, Purification, and Characterization of *Streptomyces* Sp. Strain MPPS2 Extracellular Pyomelanin Pigment. *Arch. Microbiol.* **2021**, doi:10.1007/s00203-021-02437-w.
19. Chen, W.; Ye, K.; Zhu, X.; Zhang, H.; Si, R.; Chen, J.; Chen, Z.; Song, K.; Yu, Z.; Han, B. Actinomycin X2, an Antimicrobial Depsipeptide from Marine-Derived *Streptomyces Cyaneofuscatus* Applied as a Good Natural Dye for Silk Fabric. *Mar. Drugs* **2021**, *20*, doi:10.3390/md20010016.
20. Machushynets, N. V.; Elsayed, S.S.; Du, C.; Siegler, M.A.; de la Cruz, M.; Genilloud, O.; Hankemeier, T.; Van, W.P. Discovery of Actinomycin L, a New Member of the Actinomycin Family of Antibiotics. *Sci. Rep.* **2022**, *12*, 2813, doi:10.1038/s41598-022-06736-0.
21. Soundari, A.P.G.; Mani, V.M.; Bose, V.S.C.; Jabastin, J.; Priyadarisini, V.B. A Preliminary Assessment of Yellow Pigment from *Streptomyces Parvulus* C5-5Y. *J. Pure Appl. Microbiol.* **2017**, *11*, 197–203, doi:10.22207/JPAM.11.1.25.
22. Hobbs, G.; Frazer, C.M.; Gardner, D.C.J.; Flett, F.; Oliver, S.G. Pigmented Antibiotic Production by *Streptomyces Coelicolor* A3(2): Kinetics and the Influence of Nutrients. *J. Gen. Microbiol.* **1990**, *136*, 2291–2296, doi:10.1099/00221287-136-11-2291.
23. Bystrykh, L. V.; Fernández-Moreno, M.A.; Herrema, J.K.; Malpartida, F.; Hopwood, D.A.; Dijkhuizen, L. Production of Actinorhodin-Related “Blue Pigments” by *Streptomyces Coelicolor* A3(2). *J. Bacteriol.* **1996**, *178*, 2238–2244, doi:10.1128/jb.178.8.2238-2244.1996.
24. Victor, T.M.M.; Ndlovu, T.M.; Filho, M.; Pessela, B.C.; Bull, S.; Ward, A.C. Production and Evaluation of Two Antibiotics of *Streptomyces Coelicolor* A3(2), Prodigiosin and Actinorhodin under Solid State Fermentation, Using Micro-Porous Culture. *Chem. Eng. Process. - Process Intensif.* **2022**, *170*, 108685, doi:10.1016/j.cep.2021.108685.
25. Finger, M.; Sentek, F.; Hartmann, L.; Palacio-Barrera, A.M.; Schlembach, I.; Rosenbaum, M.A.; Büchs, J. Insights into *Streptomyces Coelicolor* A3(2) Growth and Pigment Formation with High-Throughput Online Monitoring. *Eng. Life Sci.* **2022**, doi:10.1002/elsc.202100151.
26. Zhang, H.; Zhan, J.; Su, K.; Zhang, Y. A Kind of Potential Food Additive Produced by *Streptomyces Coelicolor*: Characteristics of Blue Pigment and Identification of a Novel Compound,  $\lambda$ -Actinorhodin. *Food Chem.* **2006**, *95*, 186–192, doi:10.1016/j.foodchem.2004.12.028.
27. Stankovic, N.; Radulovic, V.; Petkovic, M.; Vuckovic, I.; Jadranin, M.; Vasiljevic, B.; Nikodinovic-Runic, J. *Streptomyces* Sp. JS520 Produces Exceptionally High Quantities of Undecylprodigiosin with Antibacterial, Antioxidative, and UV-Protective Properties. *Appl. Microbiol. Biotechnol.* **2012**, *96*, 1217–1231, doi:10.1007/s00253-012-4237-3.
28. Abraham, J.; Chauhan, R. Profiling of Red Pigment Produced by *Streptomyces* Sp. JAR6 and Its Bioactivity. *3 Biotech* **2018**, *8*, 22, doi:10.1007/s13205-017-1044-7.
29. Wasserman, H.H.; Rodgers, G.C.; Keith, D.D. Undecylprodigiosin. *Tetrahedron* **1976**, *32*, 1851–1854, doi:10.1016/0040-4020(76)85185-X.
30. Sajjad, W.; Ahmad, S.; Aziz, I.; Azam, S.S.; er; Hasan, F.; Shah, A.A. Antiproliferative, Antioxidant and Binding Mechanism Analysis of Prodigiosin from Newly Isolated Radio-Resistant *Streptomyces* Sp. Strain WMA-LM31. *Mol. Biol. Rep.* **2018**, *45*, 1787–1798, doi:10.1007/s11033-018-4324-3.
31. Ramesh, C.; Vinithkumar, N.V.; Kirubakaran, R.; Venil, C.K.; aisamy; Dufossé, L. Applications of Prodigiosin Extracted from Marine Red Pigmented Bacteria *Zooshikella* Sp. and Actinomycete *Streptomyces* Sp. *Microorganisms* **2020**, *8*, doi:10.3390/microorganisms8040556.

32. Kramar, A.D.; Ilic-Tomic, T.R.; Lađarević, J.M.; Nikodinovic-Runic, J.B.; Kostic, M.M. Halochromic Cellulose Textile Obtained via Dyeing with Biocolorant Isolated from *Streptomyces* Sp. Strain NP4. *Cellulose* **2021**, *28*, 8771–8784, doi:10.1007/s10570-021-04071-7.
33. Meng-xi, L.I.; Hui-bin, H.; Jie-yun, L.; Jing-xiao, C.A.O.; Zhen-wang, Z. Antibacterial Performance of a *Streptomyces Spectabilis* Strain Producing Metacycloprodigiosin. *Curr. Microbiol.* **2021**, *78*, 2569–2576, doi:10.1007/s00284-021-02513-w.
34. Selvameenal, L.; Radhakrishnan, M.; Balagurunathan, R. Antibiotic Pigment from Desert Soil Actinomycetes; Biological Activity, Purification and Chemical Screening. *Indian J. Pharm. Sci.* **2009**, *71*, 499–504, doi:10.4103/0250-474X.58174.
35. Manikkam, R.; Venugopal, G.; Ramasamy, B.; Kumar, V. Effect of Critical Medium Components and Culture Conditions on Antitubercular Pigment Production from Novel *Streptomyces* Sp. D25 Isolated from Thar Desert, Rajasthan. *J. Appl. Pharm. Sci.* **2015**, *5*, 15–19, doi:10.7324/JAPS.2015.50603.
36. Al-Ghamdi, S.A.; Jastaniah, S.D.; Amasha, R.H. Isolation and Screening of Actinomycetes from Umm Jirsan Cave, Saudi Arabia for Their Antibacterial Activity. *Biosci. Biotechnol. Res. Commun.* **2021**, *14*, doi:10.21786/bbrc/14.1/50.
37. Manikkam, R.; Ponnuswamy, S.; Joseph, J.; Kumar, V. Antitubercular Activity of the Pigment from Forest Soil *Streptomyces* Sp. SFA5. *Bangladesh J. Pharmacol.* **2016**, *11*, 138–140, doi:10.3329/bjp.v11i1.24238.
38. Prashanthi, K.; Suryan, S.; Varalakshmi, K.N. In Vitro Anticancer Property of Yellow Pigment from *Streptomyces Griseoaurantiacus* JUACT 01. *Brazilian Arch. Biol. Technol.* **2015**, *58*, 869–876, doi:10.1590/S1516-89132015060271.
39. Naligama, K.; Weerasinghe, K.; Halmillawewa, A. Characterization of Bioactive Actinomycetes Isolated from Kadolkele Mangrove Sediments, Sri Lanka. *Polish J. Microbiol.* **2022**, *71*, 191–204, doi:10.33073/pjm-2022-017.
40. Kamble Geetanjali, R.; Gireesh Babu, K.; Hiremath Shivaprakash, V.; Hiremath Murigendra, B. In Vitro Antimicrobial and Anti-Proliferative Activity of Crude Methanolic Extract of Pigment from *Streptomyces* Spp. on HT-1080 Fibro Sarcoma Cell Line. *Res. J. Biotechnol.* **2022**, *17*, 64–69, doi:10.25303/1705rjbt64069.
41. Karuppiah, V.; Aarthi, C.; ramohan; Sivakumar, K.; Kannan, L. Statistical Optimization and Anticancer Activity of a Red Pigment Isolated from *Streptomyces* Sp. PM4. *Asian Pac. J. Trop. Biomed.* **2013**, *3*, 650–656, doi:10.1016/S2221-1691(13)60131-8.
42. Saengkhae, C.; Srivibool, R.; Watanadilok, R.; Enomoto, K. Partially Purified Pigment Extract from *Streptomyces* A 16-1 Induces Apoptosis of Human Carcinoma of Nasopharynx Cell (KB Cells) via the Mitochondrial and Caspase-3 Pathway. *Walailak J. Sci. Technol.* **2017**, *14*, doi:10.14456/vol14iss1pp.
43. Prasad, R.; Sasikala, V.; Vetrivel, K.S.; Dharmalingam, K. A Novel Extracellular Protein of *Streptomyces Peucetius* Binds to Daunorubicin but Does Not Inhibit the Bioactivity of the Antibiotic. *Biochem. Biophys. Res. Commun.* **2003**, *311*, 460–464, doi:10.1016/j.bbrc.2003.09.229.
44. Dharmaraj, S.; Ashokkumar, B.; Dhevendaran, K. Food-Grade Pigments from *Streptomyces* Sp. Isolated from the Marine Sponge *Callyspongia Diffusa*. *Food Res. Int.* **2009**, *42*, 487–492, doi:10.1016/j.foodres.2009.02.006.
45. Singh, N.; Naik, B.; Kumar, V.; Kumar, A.; Kumar, V.; Gupta, S. Actinobacterial Assisted Synthesis of Nanoparticles and Its Iological Activity. *J. Microbiol. Biotechnol. Food Sci.* **2021**, *10*, 604–608, doi:10.15414/jmbfs.2021.10.4.604-608.
46. Vaishnavi, M.; Manigundan, K.; Smalia, T.; Nandhini, S.U.; Gopikrishnan, V.; Kumar, A.; Hanna, L.E.; Radhakrishnan, M.; Aruni, W. Antibacterial and Anti-HIV Activity of Extracellular Pigment from *Streptomyces* Sp. S45 Isolated from Sabarimala Forest Soil, India. *Indian J. Exp. Biol.* **2020**, *58*, 861–868, doi:10.56042/ijeb.v58i12.44575.
47. Abdelfattah, M.S.; Toume, K.; Arai, M.A.; Masu, H.; Ishibashi, M. Katorazone, a New Yellow Pigment with a 2-

- Azaquinone-Phenylhydrazone Structure Produced by *Streptomyces* Sp. IFM 11299. *Tetrahedron Lett.* **2012**, *53*, 3346–3348, doi:10.1016/j.tetlet.2012.04.073.
48. Zhu, Y.; Shang, X.; Yang, L.; Zheng, S.; Liu, K.; Li, X. Purification, Identification and Properties of a New Blue Pigment Produced from *Streptomyces* Sp. A1013Y. *Food Chem.* **2020**, *308*, 125600, doi:10.1016/j.foodchem.2019.125600.
49. Vijayabharathi, R.; Bruheim, P.; Andreassen, T.; Raja, D.S.; Devi, P.B.; Sathyabama, S.; Priyadarisini, V.B. Assessment of Resistomycin, as an Anticancer Compound Isolated and Characterized from *Streptomyces Aurantiacus* AAA5. *J. Microbiol.* **2011**, *49*, 920–926, doi:10.1007/s12275-011-1260-5.
50. Kramar, A.; Ilic-Tomic, T.; Petkovic, M.; Radulović, N.; Kostic, M.; Jovic, D.; Nikodinovic-Runic, J. Crude Bacterial Extracts of Two New *Streptomyces* Sp. Isolates as Bio-Colorants for Textile Dyeing. *World J. Microbiol. Biotechnol.* **2014**, *30*, 2231–2240, doi:10.1007/s11274-014-1644-x.
51. Azimi, S.; Baserisalehi, M.; Bahador, N. Evaluation of Antimicrobial Pigment Produced by *Streptomyces Coeruleorubidus*. *Nat. Environ. Pollut. Technol.* **2014**, *13*, 641–644.
52. Scribner, H.E.; Tang, T.; Bradley, S.G. Production of a Sporulation Pigment by *Streptomyces Venezuelae*. *Appl. Microbiol.* **1973**, *25*, 873–879, doi:10.1128/aem.25.6.873-879.1973.
53. Mohanasrinivasan SriramKalyan P. Ipsita N. Subathradevi C. Selvarajan E. Suganthi V. Jemimah N.S., V. Fermentative Production of Extracellular Pigment from *Streptomyces Coelicolor* MSIS1. *Res. J. Biotechnol.* **2013**, *8*.
