# Supplementary material
Source: MDPI journal article supplement (https://www.mdpi.com/2079-6412/12/12/1858)
Supplement: s1 [file s1]

Archive with 6 entries (6 files):
- Table S1.pdf
- Table S14.pdf
- Table S2-S4.pdf
- Table S5.pdf
- Table S6.pdf
- Table S7-S13.pdf
