# Supplementary material
Source: MDPI journal article supplement (https://www.mdpi.com/2079-6412/12/12/1858)
Supplement: s1 [file s1 › Table S6.pdf]

**Table S6.** List of compounds retrieved from the included papers.

| Compound Name                           | SMILES <sup>a</sup>                                                       | <i>Streptomyces</i> strain                 | Bioactivity tested | Source type              | Ref.   |
|-----------------------------------------|---------------------------------------------------------------------------|--------------------------------------------|--------------------|--------------------------|--------|
| Metacycloprodigosin (1)                 | <chem>CCC1CCCCCCCCC2=CC1=C(N2)C=C3C(=CC(=N3)C4=CC=CN4)OC</chem>           | <i>Streptomyces spectabilis</i> L20190601  | Antimicrobial      | Soil (Free – living)     | [1]    |
|                                         |                                                                           | <i>Streptomyces</i> sp. JS520              | Multiple           | Soil (Free – living)     | [2]    |
| Undecylprodigosin (2)                   | <chem>CCCCCCCCCCCCC1=CC=C(N1)C=C1N=C(C=C1OC)C1=CC=CN1</chem>              | <i>Streptomyces</i> sp. JAR6               | Multiple           | Soil (Free – living)     | [3]    |
|                                         |                                                                           | <i>Streptomyces longisporus</i> rubber M-3 | N/A                | N/A                      | [4]    |
| Streptorubrin A                         | <chem>[H]C1=C(CCCCCCCCCC)NC(\C=C2\N=C(C=C2OC)C2=CC=CN2)=C1</chem>         | <i>Streptomyces</i> sp. CWW6               | Antimicrobial      | Freshwater (Free-living) | [5]    |
| Streptorubrin B (3)                     | <chem>CCC1CCCCCCCCC2=CC1=C(N2)\C=C1\N=C(C=C1OC)C1=CC=CN1</chem>           | <i>Streptomyces</i> sp. 13-4               |                    |                          |        |
|                                         |                                                                           | <i>Streptomyces</i> sp. WMA-LM31           | Multiple           | Soil (Free – living)     | [6]    |
|                                         |                                                                           | <i>Streptomyces</i> sp. BSE6.1             | Antimicrobial      | N/A                      | [7]    |
| Prodigiosin (4)                         | <chem>CCCCC1=C\C=C\C2=C(OC)C=C(N2)C2=CC=CN2)N=C1C</chem>                  | <i>Streptomyces coelicolor</i> A3(2)       | N/A                | N/A                      | [8–11] |
|                                         |                                                                           | <i>Streptomyces coelicolor</i> A3(2)       | Antimicrobial      | N/A                      | [10]   |
|                                         |                                                                           | <i>Streptomyces</i> sp. NP4                | Cytotoxic          | Soil (Free – living)     | [12]   |
| Bright yellow compound (5) <sup>1</sup> | <chem>[H]C1=C(C(=O)C2=C(C(O)=CC=C2)C1=O)C1=C(OC)C=C(C(C)C=C1C(O)=O</chem> |                                            |                    |                          |        |
| Orange compound (6) <sup>2</sup>        | <chem>COC1=C(C(=CC(C)=C1)C(O)=O)C1=C(O)C(=O)C2=C(C=CC=C2O)C1=O</chem>     | <i>Streptomyces coelicolor</i> A3(2)       | Antimicrobial      | N/A                      | [10]   |
| Compound (7) <sup>3</sup>               | <chem>COC1=C2C(=CC(C)=C1)C(=O)OC1=C2C(=O)C2=C(C(O)=CC=C2)C1=O</chem>      |                                            |                    |                          |        |

|                                                   |                                                                                                                                                                                                                                                                        |                                      |               |                      |        |
|---------------------------------------------------|------------------------------------------------------------------------------------------------------------------------------------------------------------------------------------------------------------------------------------------------------------------------|--------------------------------------|---------------|----------------------|--------|
| Actinomycin<br>L <sub>1</sub> <sup>4</sup><br>(8) | <chem>CC(C)[C@H]1NC(=O)[C@@H](NC(=O)C2=CC=C(C)C3=C2N=C2C(O3)=C(C)C(=O)C(N)=C2C(=O)N[C@H]2[C@@H](C)OC(=O)[C@H](C(C)C)N(C)C(=O)CN(C)C(=O)[C@H]3CC4(CN3C(=O)[C@H](NC2=O)C(C)C)NC(=O)C2=C(N4)C=CC=C2)[C@@H](C)OC(=O)[C@H](C(C)C)N(C)C(=O)CN(C)C(=O)[C@@H]2CCCN2C1=O</chem> | <i>Streptomyces sp.</i><br>MBT27     | Antimicrobial | Soil (Free – living) | [13]   |
| Actinomycin<br>L <sub>2</sub> <sup>4</sup><br>(9) | <chem>CC(C)[C@H]1NC(=O)[C@@H](NC(=O)C2=CC=C(C)C3=C2N=C2C(O3)=C(C)C(=O)C(N)=C2C(=O)N[C@H]2[C@@H](C)OC(=O)[C@H](C(C)C)N(C)C(=O)CN(C)C(=O)[C@H]3CC4(CN3C(=O)[C@H](NC2=O)C(C)C)NCC2=C(C=CC=C2)N4=O)[C@@H](C)OC(=O)[C@H](C(C)C)N(C)C(=O)CN(C)C(=O)[C@@H]2CCCN2C1=O</chem>   |                                      |               |                      |        |
| Actinomycin<br>X2<br>(10)                         | <chem>[H][C@@]12CCCN1C(=O)[C@H](NC(=O)[C@@H](NC(=O)C1=C3N=C4C(OC3=C(C)C=C1)=C(C)C(=O)C(N)=C4C(=O)NC1[C@H](C)OC(=O)[C@H](C(C)C)N(C)C(=O)CN(C)C(=O)[C@]3([H])CC(=O)CN3C(=O)[C@@H](NC1=O)C(C)C)[C@H](C)OC(=O)[C@@H](C(C)C)N(C)C(=O)CN(C)C2=O)C(C)C</chem>                 | <i>Streptomyces cyaneofuscatus</i>   | Antimicrobial | Marine Symbiont      | [14]   |
| γ-<br>Actinorhodin<br>(11)                        | <chem>C[C@H]1O[C@@H]2CC(=O)O[C@@H]2C2=C1C(=O)C1=C(C(O)=CC(=C1O)C1=C(O)C3=C(C(O)=C1)C(=O)C1=C([C@@H](C)O[C@@H]4CC(=O)O[C@H]14)C3=O)C2=O</chem>                                                                                                                          | <i>Streptomyces coelicolor</i> A3(2) | N/A           | N/A                  | [8–11] |

|                                 |                                                                                                                                                                    |                                           |               |                        |      |
|---------------------------------|--------------------------------------------------------------------------------------------------------------------------------------------------------------------|-------------------------------------------|---------------|------------------------|------|
| Actinorhodin<br>(13)            | <chem>C[C@H]1O[C@H](CC(O)=O)CC2=C1C(=O)C1=C(C(O)=C(=C1O)C1=C(O)C3=C(C(O)=C1)C(=O)C1=C([C@@H](C)O[C@H](CC(O)=O)C1)C3=O)C2=O</chem>                                  |                                           |               |                        |      |
| $\lambda$ -Actinorhodin<br>(12) | <chem>CC(COC1COC1)OC(=O)C[C@H]1O[C@H](C)C2=C(C1O)C(=O)C1=C(C(O)=C(C(O)=C1O)C1=C(O)C3=C(C(O)=C1O)C(=O)C1=C([C@@H](C)O[C@H](CC(=O)OC(C)COC4COC4)C1O)C3=O)C2=O</chem> | <i>Streptomyces coelicolor</i> 100        | Cytotoxic     | Soil (Free – living)   | [15] |
| Grixazone A<br>(14)             | <chem>[H]C(=O)C1=CC=C2OC3=C(C(=O)C(N)=C(SCC(NC(C)=O)C(O)=O)C3=NC2=C1</chem>                                                                                        | <i>Streptomyces griseus</i>               | Antimicrobial | N/A                    | [16] |
| Grixazone B<br>(15)             | <chem>CC(=O)NC(CSC1=C(N)C(=O)C=C2OC3=CC=C(C=C3N=C12)C(O)=O)C(O)=O</chem>                                                                                           |                                           |               |                        |      |
| Indigoidine<br>(16)             | <chem>C1=C(C(=O)NC(=O)C1=N)C2=C(NC(=O)C(=C2)N)O</chem>                                                                                                             | <i>Streptomyces aureofaciens</i> CCM 3239 | N/A           | Soil (Free – living)   | [17] |
| Katorazone<br>(17)              | <chem>[H]N(\N=C1/C2=C(C(O)=C(C=C2)C(=O)C2=C1C=C(C)N=C2C)C1=CC=CC=C1C(=O)OC</chem>                                                                                  | <i>Streptomyces</i> sp. IFM 11299         | Cytotoxic     | Soil (Free – living)   | [18] |
| TDTA <sup>5</sup><br>(18)       | <chem>C[C@@H]1O[C@@H](CC(O)=O)[C@@H](O)C2=C1C(O)=C1C(=O)C3=C([C@H]4C[C@@H](O)[C@]3(O)[C@@H](C)O4)C(=O)C1=C2O</chem>                                                | <i>Streptomyces</i> sp. A1013Y            | Antioxidant   | Soil (Free – living)   | [19] |
| Resistomycin<br>(19)            | <chem>CC1=C2C(O)=CC3=C4C2=C(C(O)=C1)C(=O)C1=C4C(=C(O)C=C1O)C(=O)C3(C)C</chem>                                                                                      | <i>Streptomyces aurantiacus</i> AAA5      | Multiple      | Soil (Free – living)   | [20] |
| Melanin                         |                                                                                                                                                                    | <i>Streptomyces</i> sp.                   | Antioxidant   | Marine (Free – living) | [21] |
|                                 |                                                                                                                                                                    | <i>Streptomyces</i> sp. MVCS13            | Antimicrobial | Marine (Free – living) | [22] |

|            |                                                      |               |                              |      |
|------------|------------------------------------------------------|---------------|------------------------------|------|
|            | <i>Streptomyces</i><br>sp.(F1,F2,F3)                 | Antimicrobial | Marine<br>(Free –<br>living) | [23] |
|            | <i>Streptomyces</i><br><i>glaucescens</i> NEAE-<br>H | Multiple      | Soil (Free –<br>living)      | [24] |
|            | <i>Streptomyces</i> sp.<br>ZL-24                     | Multiple      | Soil (Free –<br>living)      | [25] |
|            | <i>Streptomyces</i><br><i>glaucescens</i><br>KCTC988 | Antioxidant   | N/A                          | [26] |
|            | <i>Streptomyces</i><br><i>cavourensis</i> SV 21      | Multiple      | Marine<br>Symbiont           | [27] |
|            | <i>Streptomyces</i><br><i>puniceus</i> RHPR9         | Multiple      | Terrestrial<br>Symbiont      | [28] |
| Eumelanin  | <i>Streptomyces</i><br><i>fulvissimus</i> MPPS4      | N/A           | N/A                          | [29] |
|            | <i>Streptomyces</i><br><i>xiamenensis</i> MPPS6      |               |                              |      |
|            | <i>Streptomyces parvus</i><br>BSB49                  | Multiple      | Soil (Free –<br>living)      | [30] |
| Pyomelanin | <i>Streptomyces</i> sp.<br>MPPS2                     | N/A           | N/A                          | [31] |

<sup>1</sup>The compound name is 2-(5-hydroxy-1,4-dioxo-1,4-dihydronaphthalen-2-yl)-3-methoxy-5-methylbenzoic acid

<sup>2</sup>The compound name is 2-(3,5-dihydroxy-1,4-dioxo-1,4-dihydronaphthalen-2-yl)-3-methoxy-5-methylbenzoic acid

<sup>3</sup> The compound name is 8-hydroxy-1-methoxy-3-methyl-5H-dibenzo [*c,g*] chromene-5,7,12-trione

<sup>4</sup>These compounds are pigment associated compounds however, its role as a pigment or its coloration is not clear.

<sup>5</sup>The compound name is 4,8,13-trihydroxy-6,11-dione-trihydrogranaticins A (TDTA)

## References

1. Meng-xi, L.I.; Hui-bin, H.; Jie-yun, L.; Jing-xiao, C.A.O.; Zhen-wang, Z. Antibacterial Performance of a *Streptomyces Spectabilis* Strain Producing Metacycloprodigiosin. *Curr. Microbiol.* **2021**, *78*, 2569–2576, doi:10.1007/s00284-021-02513-w.
2. Stankovic, N.; Radulovic, V.; Petkovic, M.; Vuckovic, I.; Jadranin, M.; Vasiljevic, B.; Nikodinovic-Runic, J. *Streptomyces* Sp. JS520 Produces Exceptionally High Quantities of Undecylprodigiosin with Antibacterial, Antioxidative, and UV-Protective Properties. *Appl. Microbiol. Biotechnol.* **2012**, *96*, 1217–1231, doi:10.1007/s00253-012-4237-3.
3. Abraham, J.; Chauhan, R. Profiling of Red Pigment Produced by *Streptomyces* Sp. JAR6 and Its Bioactivity. 3

- Biotech* **2018**, *8*, 22, doi:10.1007/s13205-017-1044-7.
4. Wasserman, H.H.; Rodgers, G.C.; Keith, D.D. Undecyclprodigiosin. *Tetrahedron* **1976**, *32*, 1851–1854, doi:10.1016/0040-4020(76)85185-X.
  5. Gerber, N.N.; Lechevalier, M.P. Prodiginine (Prodigiosin-like) Pigments from *Streptomyces* and Other Aerobic Actinomycetes. *Can. J. Microbiol.* **1976**, *22*, 658–667, doi:10.1139/m76-097.
  6. Sajjad, W.; Ahmad, S.; Aziz, I.; Azam, S.S.; er; Hasan, F.; Shah, A.A. Antiproliferative, Antioxidant and Binding Mechanism Analysis of Prodigiosin from Newly Isolated Radio-Resistant *Streptomyces* Sp. Strain WMA-LM31. *Mol. Biol. Rep.* **2018**, *45*, 1787–1798, doi:10.1007/s11033-018-4324-3.
  7. Ramesh, C.; Vinithkumar, N.V.; Kirubakaran, R.; Venil, C.K.; aisamy; Dufossé, L. Applications of Prodigiosin Extracted from Marine Red Pigmented Bacteria *Zooshikella* Sp. and Actinomycete *Streptomyces* Sp. *Microorganisms* **2020**, *8*, doi:10.3390/microorganisms8040556.
  8. Hobbs, G.; Frazer, C.M.; Gardner, D.C.J.; Flett, F.; Oliver, S.G. Pigmented Antibiotic Production by *Streptomyces Coelicolor* A3(2): Kinetics and the Influence of Nutrients. *J. Gen. Microbiol.* **1990**, *136*, 2291–2296, doi:10.1099/00221287-136-11-2291.
  9. Bystrykh, L. V; Fernández-Moreno, M.A.; Herrema, J.K.; Malpartida, F.; Hopwood, D.A.; Dijkhuizen, L. Production of Actinorhodin-Related “Blue Pigments” by *Streptomyces Coelicolor* A3(2). *J. Bacteriol.* **1996**, *178*, 2238–2244, doi:10.1128/jb.178.8.2238-2244.1996.
  10. Victor, T.M.M.; Ndlovu, T.M.; Filho, M.; Pessela, B.C.; Bull, S.; Ward, A.C. Production and Evaluation of Two Antibiotics of *Streptomyces Coelicolor* A3(2), Prodigiosin and Actinorhodin under Solid State Fermentation, Using Micro-Porous Culture. *Chem. Eng. Process. - Process Intensif.* **2022**, *170*, 108685, doi:10.1016/j.cep.2021.108685.
  11. Finger, M.; Sentek, F.; Hartmann, L.; Palacio-Barrera, A.M.; Schlembach, I.; Rosenbaum, M.A.; Büchs, J. Insights into *Streptomyces Coelicolor* A3(2) Growth and Pigment Formation with High-Throughput Online Monitoring. *Eng. Life Sci.* **2022**, doi:10.1002/elsc.202100151.
  12. Kramar, A.D.; Ilic-Tomic, T.R.; Lađarević, J.M.; Nikodinovic-Runic, J.B.; Kostic, M.M. Halochromic Cellulose Textile Obtained via Dyeing with Biocolorant Isolated from *Streptomyces* Sp. Strain NP4. *Cellulose* **2021**, *28*, 8771–8784, doi:10.1007/s10570-021-04071-7.
  13. Machushynets, N. V; Elsayed, S.S.; Du, C.; Siegler, M.A.; de la Cruz, M.; Genilloud, O.; Hankemeier, T.; Van, W.P. Discovery of Actinomycin L, a New Member of the Actinomycin Family of Antibiotics. *Sci. Rep.* **2022**, *12*, 2813, doi:10.1038/s41598-022-06736-0.
  14. Chen, W.; Ye, K.; Zhu, X.; Zhang, H.; Si, R.; Chen, J.; Chen, Z.; Song, K.; Yu, Z.; Han, B. Actinomycin X2, an Antimicrobial Depsipeptide from Marine-Derived *Streptomyces Cyaneofuscatus* Applied as a Good Natural Dye for Silk Fabric. *Mar. Drugs* **2021**, *20*, doi:10.3390/md20010016.
  15. Zhang, H.; Zhan, J.; Su, K.; Zhang, Y. A Kind of Potential Food Additive Produced by *Streptomyces Coelicolor*: Characteristics of Blue Pigment and Identification of a Novel Compound,  $\lambda$ -Actinorhodin. *Food Chem.* **2006**, *95*, 186–192, doi:10.1016/j.foodchem.2004.12.028.
  16. Ohnishi, Y.; Furusho, Y.; Higashi, T.; Chun, H.K.; Furihata, K.; Sakuda, S.; Horinouchi, S. Structures of Grixazone A and B, A-Factor-Dependent Yellow Pigments Produced under Phosphate Depletion by *Streptomyces Griseus*. *J. Antibiot. (Tokyo)*. **2004**, *57*, 218–223, doi:10.7164/antibiotics.57.218.
  17. Novakova, R.; Odnogova, Z.; Kutas, P.; Feckova, L.; Kormanec, J. Identification and Characterization of an Indigoidine-like Gene for a Blue Pigment Biosynthesis in *Streptomyces Aureofaciens* CCM 3239. *Folia Microbiol. (Praha)*. **2010**, *55*, 119–125, doi:10.1007/s12223-010-0018-5.
  18. Abdelfattah, M.S.; Toume, K.; Arai, M.A.; Masu, H.; Ishibashi, M. Katorazone, a New Yellow Pigment with a 2-

- Azaquinone-Phenylhydrazone Structure Produced by *Streptomyces* Sp. IFM 11299. *Tetrahedron Lett.* **2012**, *53*, 3346–3348, doi:10.1016/j.tetlet.2012.04.073.
19. Zhu, Y.; Shang, X.; Yang, L.; Zheng, S.; Liu, K.; Li, X. Purification, Identification and Properties of a New Blue Pigment Produced from *Streptomyces* Sp. A1013Y. *Food Chem.* **2020**, *308*, 125600, doi:10.1016/j.foodchem.2019.125600.
  20. Vijayabharathi, R.; Bruheim, P.; Andreassen, T.; Raja, D.S.; Devi, P.B.; Sathyabama, S.; Priyadarisini, V.B. Assessment of Resistomycin, as an Anticancer Compound Isolated and Characterized from *Streptomyces Aurantiacus* AAA5. *J. Microbiol.* **2011**, *49*, 920–926, doi:10.1007/s12275-011-1260-5.
  21. Li, C.; Ji, C.; Tang, B. Purification, Characterisation and Biological Activity of Melanin from *Streptomyces* Sp. *FEMS Microbiol. Lett.* **2018**, *365*, doi:10.1093/femsle/fny077.
  22. Sivaperumal, P.; Kamala, K.; Rajaram, R.; Mishra, S.S. Melanin from Marine *Streptomyces* Sp. (MVCS13) with Potential Effect against Ornamental Fish Pathogens of *Carassius Auratus* (Linnaeus, 1758). *Biocatal. Agric. Biotechnol.* **2014**, *3*, 134–141, doi:10.1016/j.bcab.2014.09.007.
  23. Vasanthabharathi, V.; Lakshminarayanan, R.; Jayalakshmi, S. Melanin Production from Marine *Streptomyces*. *African J. Biotechnol.* **2011**, *10*, 11224–11234, doi:10.5897/AJB11.296.
  24. El-Naggar, N.E.-A.; El-Ewasy, S.M. Bioproduction, Characterization, Anticancer and Antioxidant Activities of Extracellular Melanin Pigment Produced by Newly Isolated Microbial Cell Factories *Streptomyces Glaucescens* NEAE-H. *Sci. Rep.* **2017**, *7*, 42129, doi:10.1038/srep42129.
  25. Wang, L.; Li, Y.; Li, Y. Metal Ions Driven Production, Characterization and Bioactivity of Extracellular Melanin from *Streptomyces* Sp. ZL-24. *Int. J. Biol. Macromol.* **2019**, *123*, 521–530, doi:10.1016/j.ijbiomac.2018.11.061.
  26. Ahn, S.-Y.; Jang, S.; Sudheer, P.D.V.N.; Choi, K.-Y. Microbial Production of Melanin Pigments from Caffeic Acid and L-Tyrosine Using *Streptomyces Glaucescens* and FCS-ECH-Expressing *Escherichia Coli*. *Int. J. Mol. Sci.* **2021**, *22*, 2413, doi:10.3390/ijms22052413.
  27. Wibowo, J.T.; Kellermann, M.Y.; Petersen, L.E.; Alfiansah, Y.R.; Lattyak, C.; Schupp, P.J. Characterization of an Insoluble and Soluble Form of Melanin Produced by *Streptomyces Cavourensis* SV 21, a Sea Cucumber Associated Bacterium. *Mar. Drugs* **2022**, *20*, doi:10.3390/md20010054.
  28. Polapally, R.; Mansani, M.; Rajkumar, K.; Burgula, S.; Hameeda, B.; Alhazmi, A.; Bantun, F.; Almalki, A.H.; Haque, S.; El Enshasy, H.A.; et al. Melanin Pigment of *Streptomyces Puniceus* RHP9 Exhibits Antibacterial, Antioxidant and Anticancer Activities. *PLoS One* **2022**, *17*, e0266676, doi:10.1371/journal.pone.0266676.
  29. Bayram, S. A Comparative Characterization Study between Fungal and Bacterial Eumelanin Pigments. *Indian J. Microbiol.* **2022**, doi:10.1007/s12088-022-01012-1.
  30. Bayram, S.; Dengiz, C.; Gerçek, Y.C.; Cetin, I.; Topcul, M.R. Bioproduction, Structure Elucidation and in Vitro Antiproliferative Effect of Eumelanin Pigment from *Streptomyces Parvus* BSB49. *Arch. Microbiol.* **2020**, *202*, 2401–2409, doi:10.1007/s00203-020-01956-2.
  31. Bayram, S. Production, Purification, and Characterization of *Streptomyces* Sp. Strain MPPS2 Extracellular Pyomelanin Pigment. *Arch. Microbiol.* **2021**, doi:10.1007/s00203-021-02437-w.
