# Supplementary material
Source: MDPI journal article supplement (https://www.mdpi.com/2079-6412/12/12/1858)
Supplement: s1 [file s1 › Table S14.pdf]

**Table S14.** List of molecules retrieved from the included papers.

|                                                                                                                                                                                  |                                                                                                                                                                                       |
|----------------------------------------------------------------------------------------------------------------------------------------------------------------------------------|---------------------------------------------------------------------------------------------------------------------------------------------------------------------------------------|
| 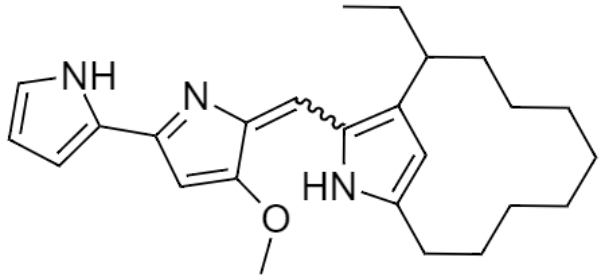 <p>Metacycloprodigiosin (1)</p>                                                                | 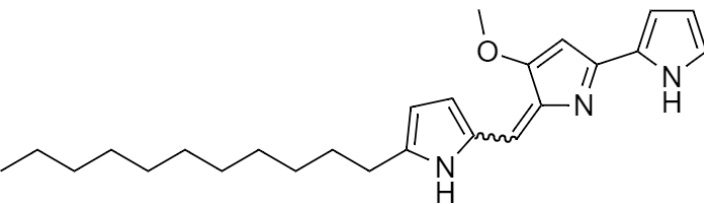 <p>Undecylprodigiosin (2)</p>                                                                      |
| 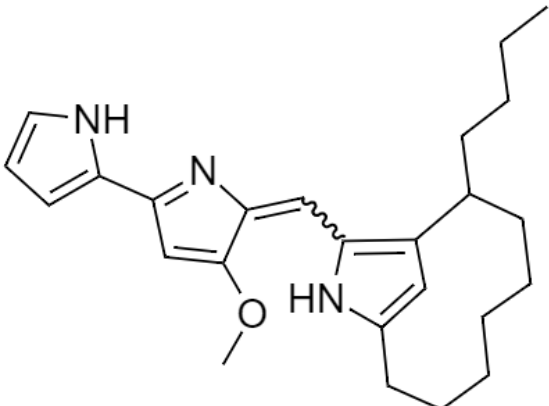 <p>Streptorubin B (3)</p>                                                                     | 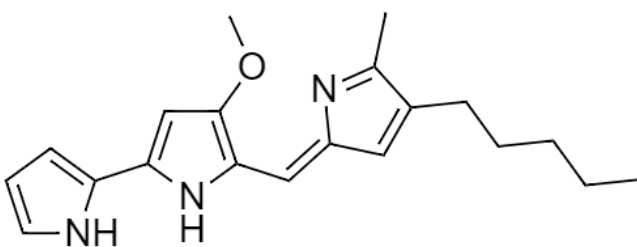 <p>Prodigiosin (4)</p>                                                                            |
| 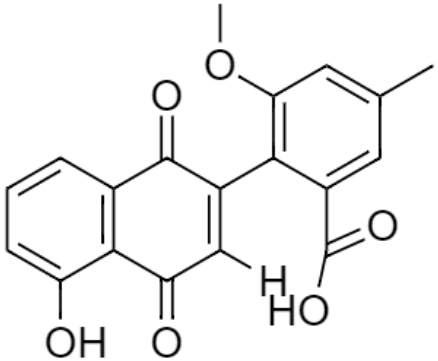 <p>2-(5-hydroxy-1,4-dioxo-1,4-dihydronaphthalen-2-yl)-3-methoxy-5-methylbenzoic acid (5)</p> | 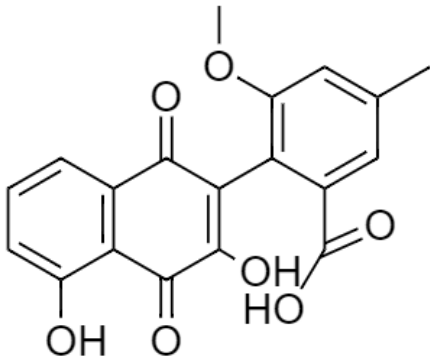 <p>2-(3,5-dihydroxy-1,4-dioxo-1,4-dihydronaphthalen-2-yl)-3-methoxy-5-methylbenzoic acid (6)</p> |

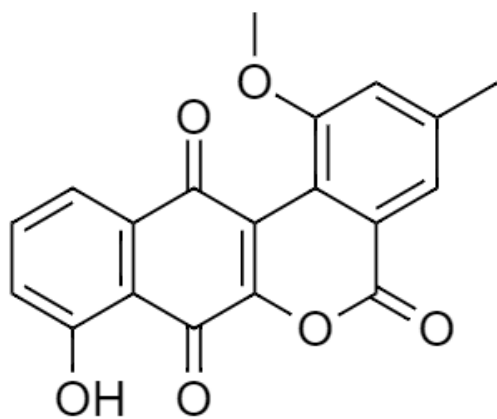

8-hydroxy-1-methoxy-3-methyl-5H-dibenzo [c,g]  
chromene-5,7,12-trione (7)

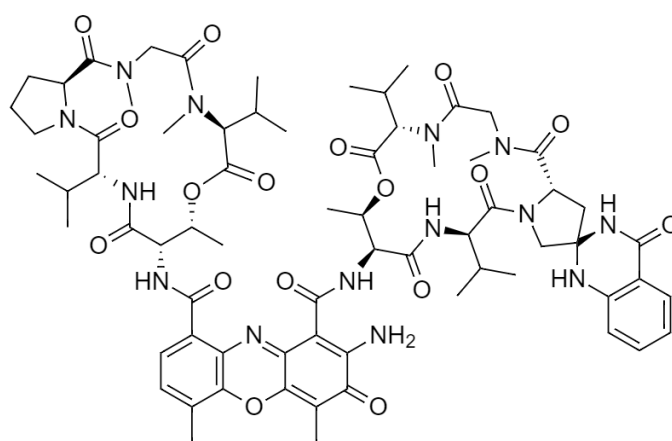

Actinomycin L1 (8)

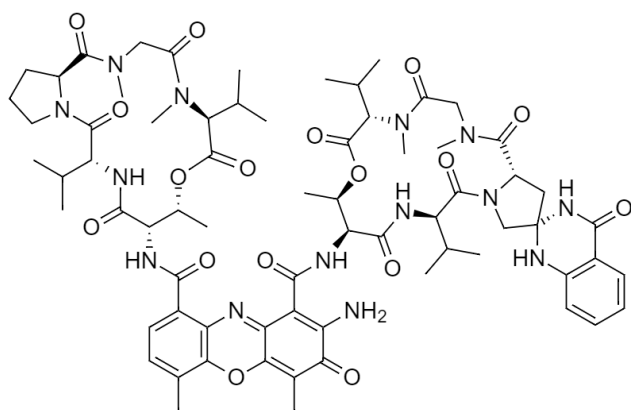

Actinomycin L2 (9)

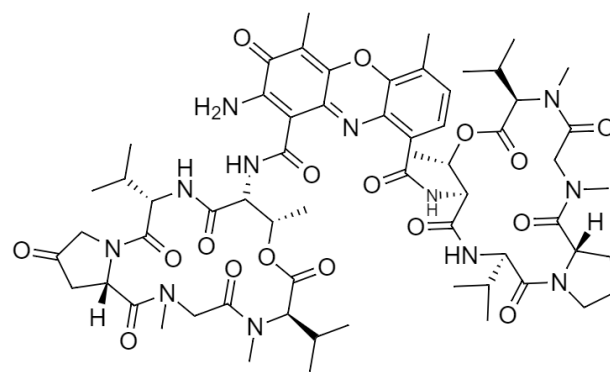

Actinomycin X2 (10)

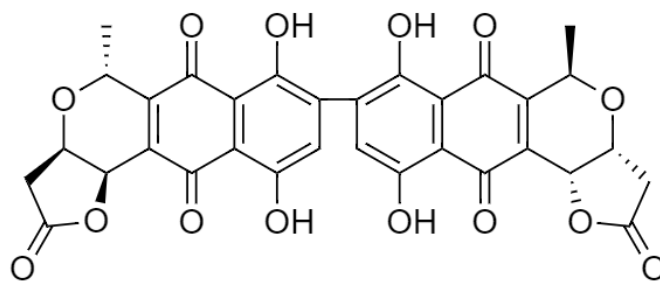

γ-Actinorhodin (11)

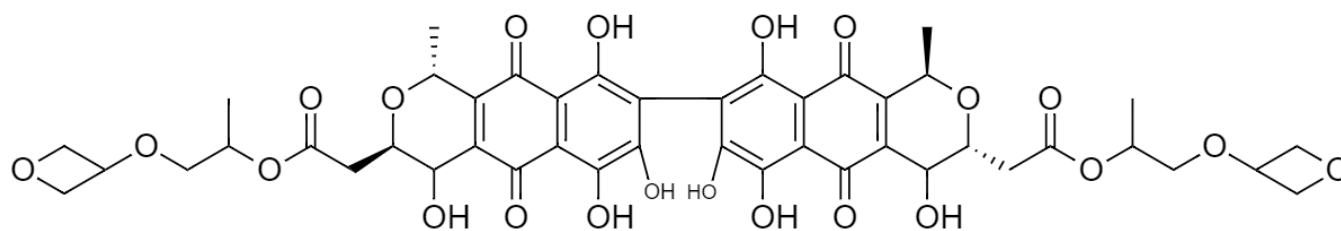

λ-Actinorhodin (12)

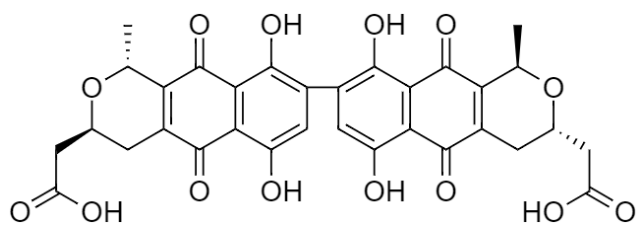

Actinorhodin (13)

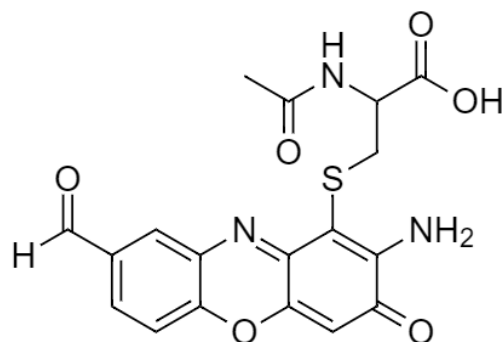

Grixazone A (14)

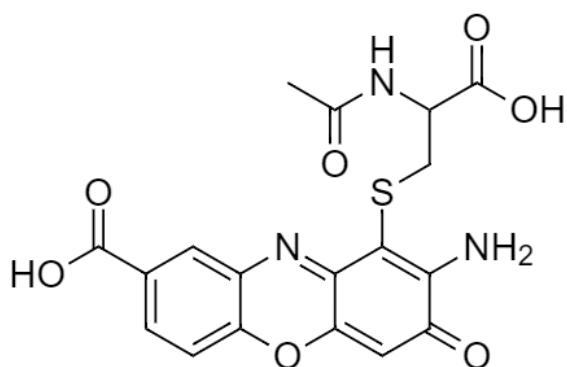

Grixazone B (15)

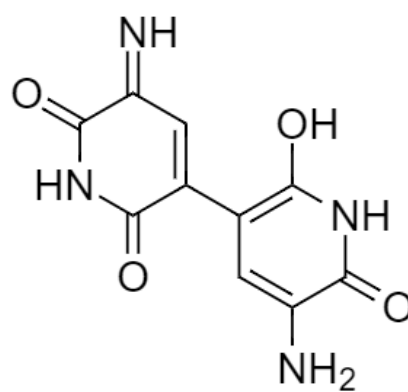

Indigoidine (16)

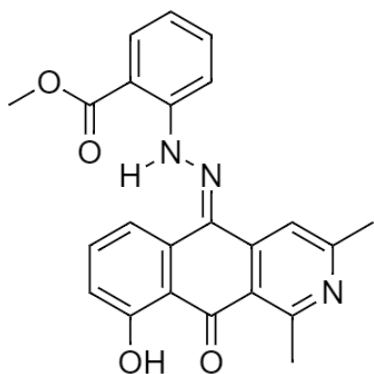

Katorazone (17)

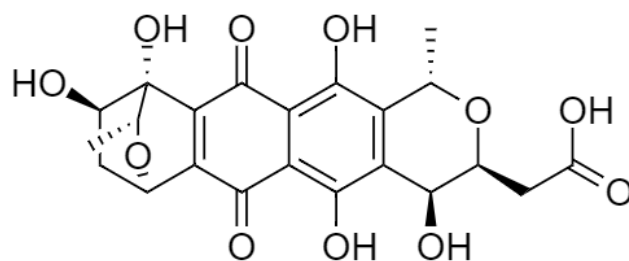4,8,13-trihydroxy-6,11-dione-trihydrogranaticins A  
TDTA (18)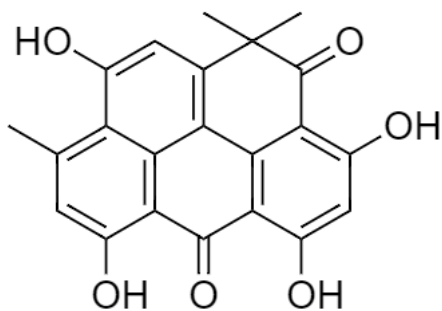

Resistomycin (19)
